# Supplementary material
Source: PubMed Central journal article supplement (PMC4814233)
Supplement: hdy201533x1.pdf [file hdy201533x1.pdf]

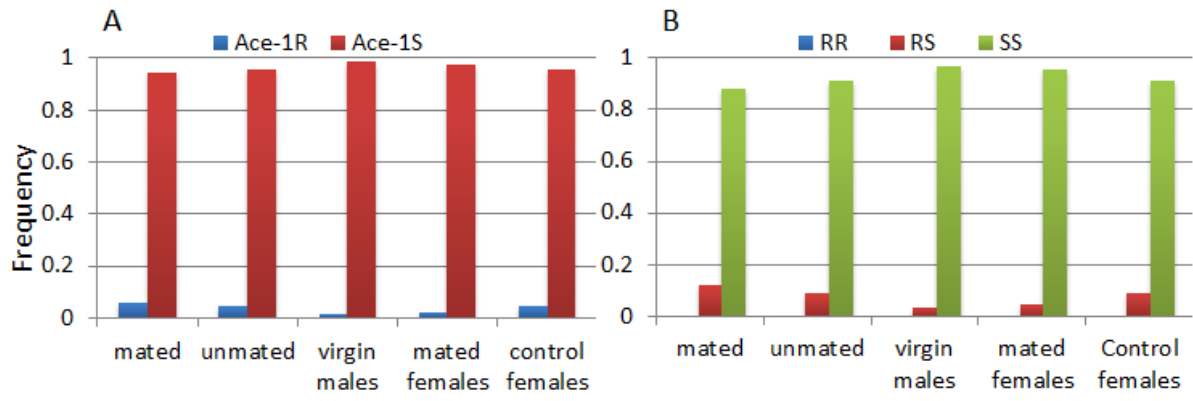

**Figure S1:** Impact of *Ace-1* mutation on mating success: Distribution of *Ace-1* alleles (A) and genotypes (B) between coupled and uncoupled males in comparison to control mosquitoes.

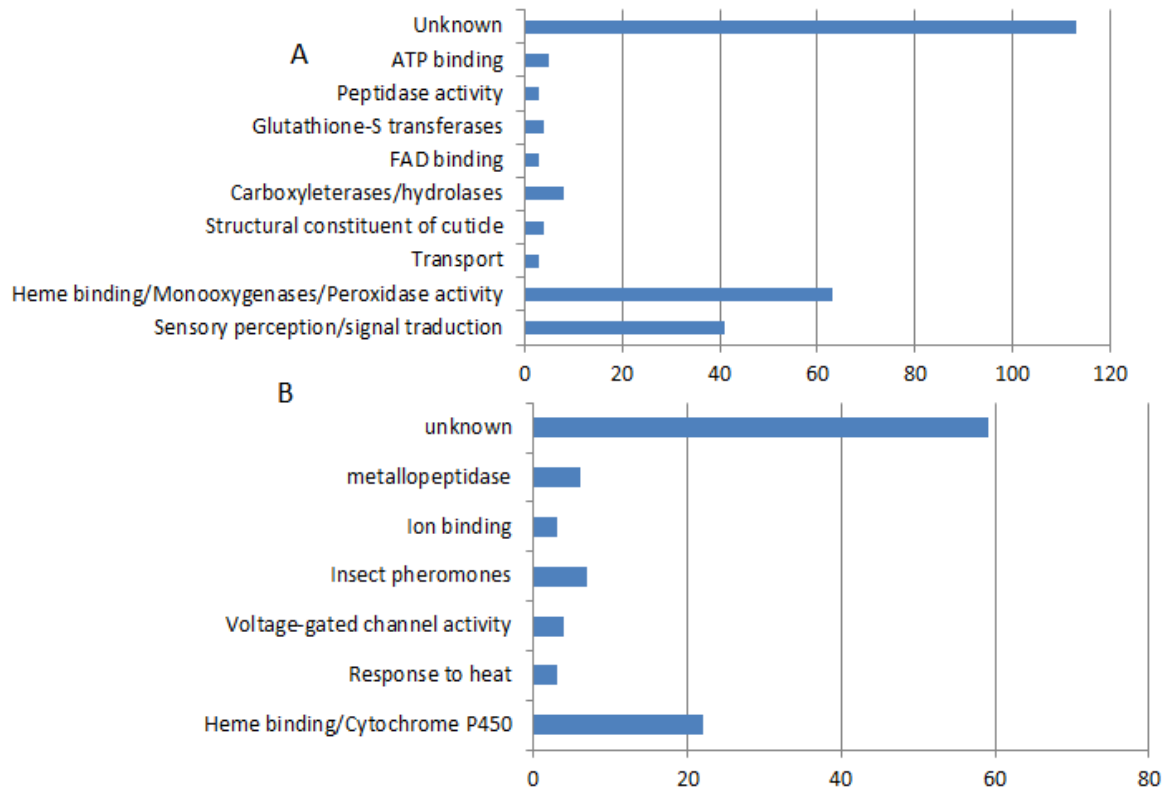

**Figure S2:** Functional annotation clustering of the classes of genes enriched among the genes up-regulated in mated (A) and unmated (B) males in VK. The DAVID software was used to define these gene groups enriched with Fisher's exact test applied to determine the *P* values.
